# Supplementary material for: Drying Grapes after the Application of Different Dipping Solutions: Effects on Hormones, Minerals, Vitamins, and Antioxidant Enzymes in Gök Üzüm (Vitis vinifera L.) Raisins
Source: MDPI journal article supplement (doi:10.3390/plants11040529), 2022-02-16
Supplement: s1 [file s1]

In this study, categorical principal components analysis was performed to determine linear or nonlinear relationships between two pre-treatments and the studied characteristics.

| Variance Accounted For<br>Total<br>(percentage) | % of Variance |
|-------------------------------------------------|---------------|
|-------------------------------------------------|---------------|

a. Total Cronbach's Alpha is based on the total Eigenvalue.

## Category Points

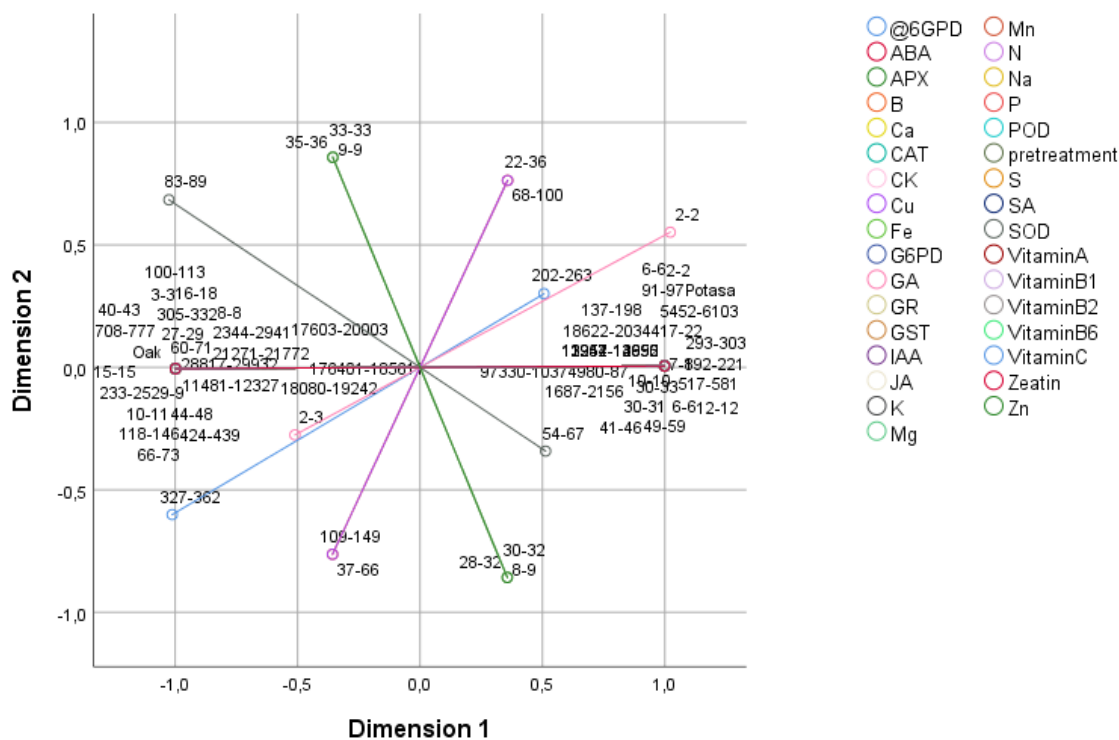

# Component Loadings

| Component Loadings |           |       |
|--------------------|-----------|-------|
|                    | Dimension |       |
|                    | 1         | 2     |
| pretreatment       | ,999      | ,005  |
| GR                 | -,999     | -,005 |
| GST                | -,999     | -,005 |
| G6PD               | -,999     | -,005 |
| @6GPD              | -,716     | -,425 |
| CAT                | -,999     | -,005 |
| POD                | -,999     | -,005 |
| SOD                | -,725     | ,484  |
| APX                | -,356     | ,858  |
| IAA                | -,999     | -,005 |
| ABA                | -,999     | -,005 |
| GA                 | -,723     | -,390 |
| SA                 | -,999     | -,005 |
| CK                 | -,999     | -,005 |
| Zeatin             | -,999     | -,005 |
| JA                 | -,356     | ,858  |
| N                  | -,999     | -,005 |
| Ca                 | -,999     | -,005 |
| K                  | -,999     | -,005 |
| Mg                 | -,999     | -,005 |
| Na                 | -,999     | -,005 |
| P                  | -,999     | -,005 |
| S                  | -,999     | -,005 |
| Mn                 | -,999     | -,005 |
| Cu                 | -,357     | -,763 |
| Fe                 | -,999     | -,005 |
| Zn                 | -,356     | ,858  |
| B                  | -,357     | -,763 |
| VitaminB1          | -,999     | -,005 |
| VitaminB2          | -,999     | -,005 |
| VitaminB6          | -,999     | -,005 |
| VitaminC           | -,999     | -,005 |
| VitaminA           | -,999     | -,005 |

Variable Principal Normalization.

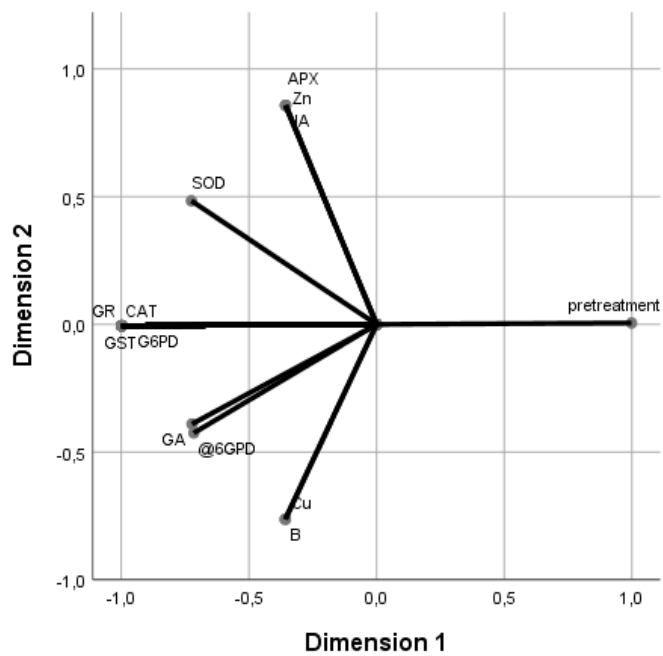

### Model Summary

| Dimension | Cronbach's Alpha  | Variance Accounted For |               |
|-----------|-------------------|------------------------|---------------|
|           |                   | Total (Eigenvalue)     | % of Variance |
| 1         | ,968              | 7,183                  | 79,809        |
| 2         | ,266              | 1,309                  | 14,545        |
| Total     | ,993 <sup>a</sup> | 8,492                  | 94,354        |

a. Total Cronbach's Alpha is based on the total Eigenvalue.

## Component Loadings

### Component Loadings

|              | Dimension |       |
|--------------|-----------|-------|
|              | 1         | 2     |
| pretreatment | ,994      | ,070  |
| GR           | -,994     | -,070 |
| GST          | -,994     | -,070 |
| G6PD         | -,994     | -,070 |
| @6GPD        | -,713     | -,500 |
| CAT          | -,994     | -,070 |
| POD          | -,994     | -,070 |
| SOD          | -,758     | ,566  |
| APX          | -,408     | ,842  |

Variable Principal Normalization.

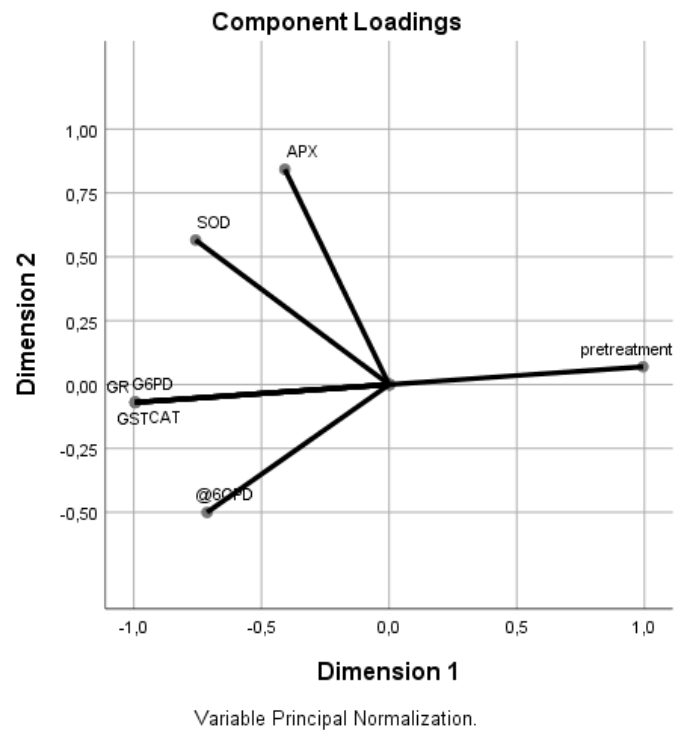

### Model Summary

| Dimension | Cronbach's Alpha  | Variance Accounted For |               |
|-----------|-------------------|------------------------|---------------|
|           |                   | Total<br>(Eigenvalue)  | % of Variance |
| 1         | ,971              | 6,649                  | 83,113        |
| 2         | ,000              | 1,000                  | 12,500        |
| Total     | ,993 <sup>a</sup> | 7,649                  | 95,613        |

a. Total Cronbach's Alpha is based on the total Eigenvalue.

### Category Points

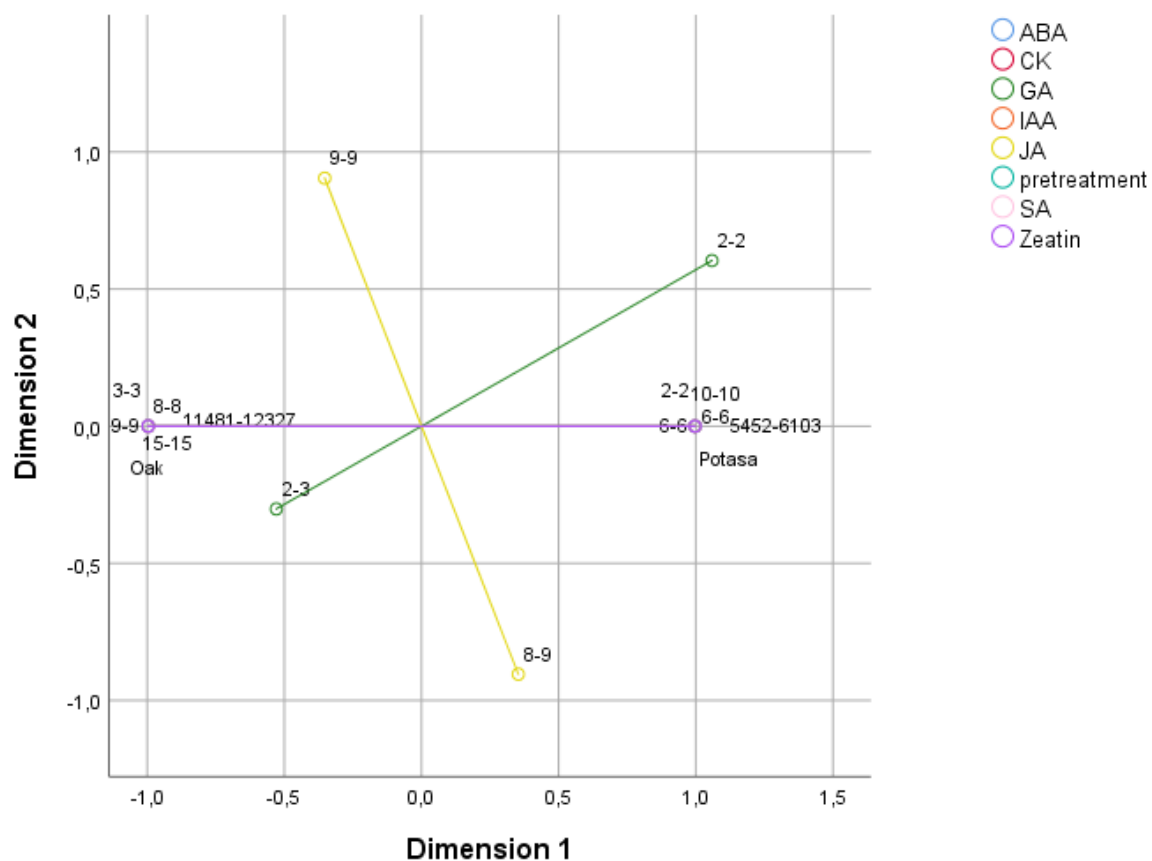

### Correlations Transformed Variables

|              | pretreatment | IAA    | ABA    | GA    | SA     | CK     | Zeatin | JA    |
|--------------|--------------|--------|--------|-------|--------|--------|--------|-------|
| pretreatment | 1,000        | -1,000 | -1,000 | -,707 | -1,000 | -1,000 | -1,000 | -,333 |
| IAA          | -1,000       | 1,000  | 1,000  | ,707  | 1,000  | 1,000  | 1,000  | ,333  |
| ABA          | -1,000       | 1,000  | 1,000  | ,707  | 1,000  | 1,000  | 1,000  | ,333  |
| GA           | -,707        | ,707   | ,707   | 1,000 | ,707   | ,707   | ,707   | ,000  |
| SA           | -1,000       | 1,000  | 1,000  | ,707  | 1,000  | 1,000  | 1,000  | ,333  |
| CK           | -1,000       | 1,000  | 1,000  | ,707  | 1,000  | 1,000  | 1,000  | ,333  |
| Zeatin       | -1,000       | 1,000  | 1,000  | ,707  | 1,000  | 1,000  | 1,000  | ,333  |
| JA           | -,333        | ,333   | ,333   | ,000  | ,333   | ,333   | ,333   | 1,000 |
| Dimension    | 1            | 2      | 3      | 4     | 5      | 6      | 7      | 8     |
| Eigenvalue   | 6,649        | 1,000  | ,351   | ,000  | ,000   | ,000   | ,000   | ,000  |

### Component Loadings

|              | Dimension |       |
|--------------|-----------|-------|
|              | 1         | 2     |
| pretreatment | ,997      | ,000  |
| IAA          | -,997     | ,000  |
| ABA          | -,997     | ,000  |
| GA           | -,749     | -,427 |
| SA           | -,997     | ,000  |
| CK           | -,997     | ,000  |
| Zeatin       | -,997     | ,000  |
| JA           | -,353     | ,904  |

Variable Principal Normalization.

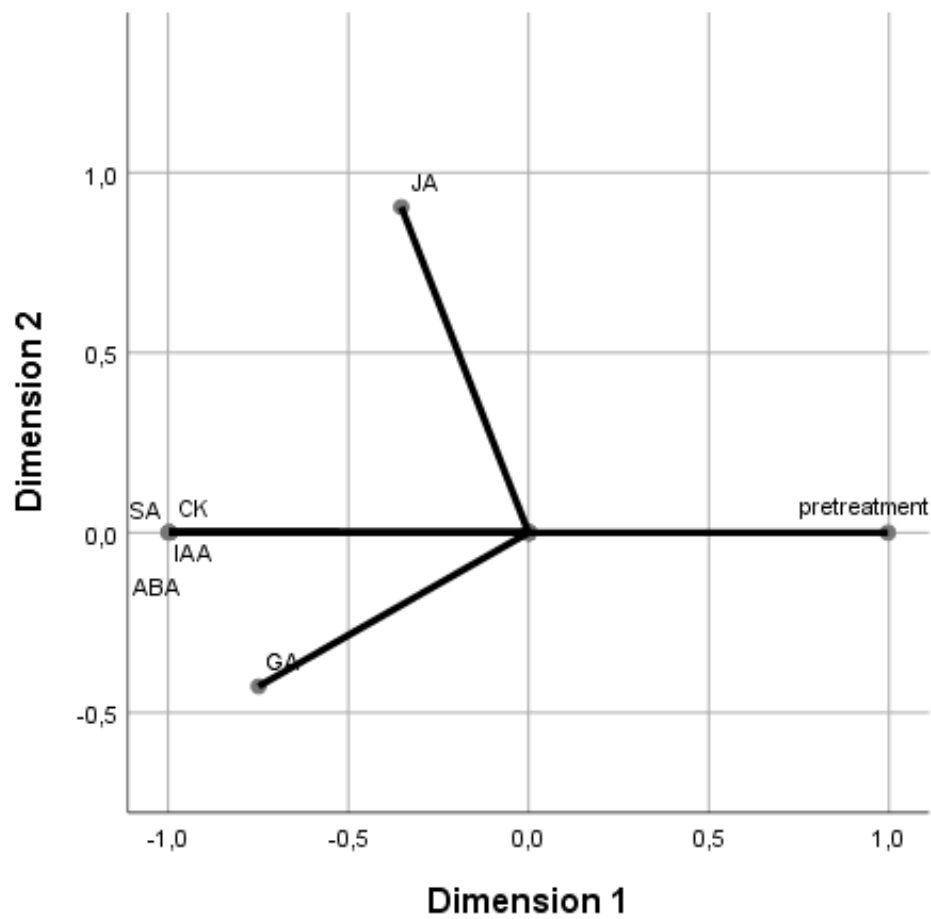

### Model Summary

| Dimension | Cronbach's Alpha  | Variance Accounted For |               |
|-----------|-------------------|------------------------|---------------|
|           |                   | Total (Eigenvalue)     | % of Variance |
| 1         | ,979              | 10,366                 | 79,741        |
| 2         | ,564              | 2,085                  | 16,041        |
| Total     | ,996 <sup>a</sup> | 12,452                 | 95,783        |

a. Total Cronbach's Alpha is based on the total Eigenvalue.

### Category Points

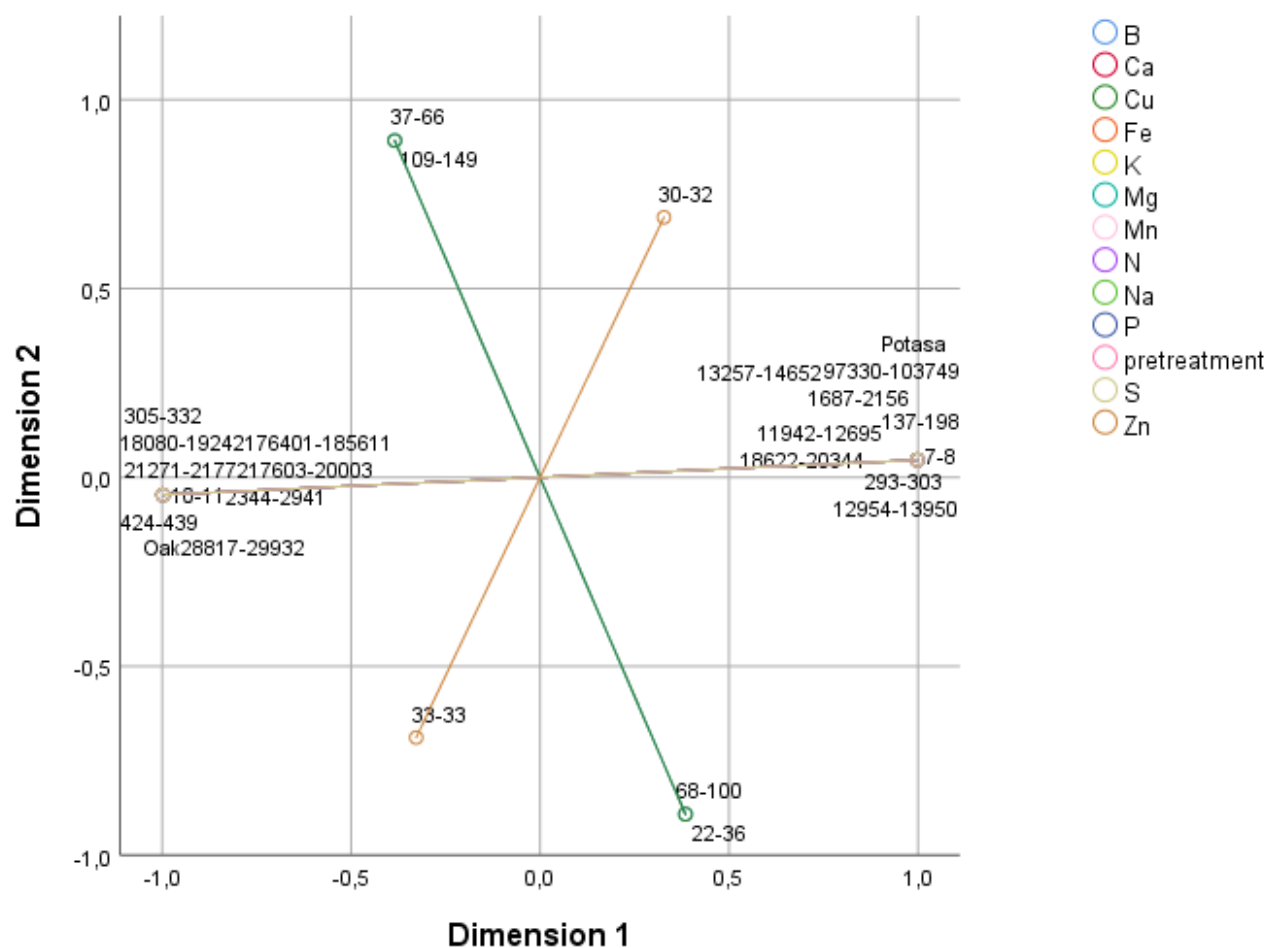

### Component Loadings

|              | Dimension |       |
|--------------|-----------|-------|
|              | 1         | 2     |
| pretreatment | ,998      | ,046  |
| N            | -,998     | -,046 |
| Ca           | -,998     | -,046 |
| K            | -,998     | -,046 |
| Mg           | -,998     | -,046 |
| Na           | -,998     | -,046 |
| P            | -,998     | -,046 |
| S            | -,998     | -,046 |
| Mn           | -,998     | -,046 |
| Cu           | -,385     | ,892  |
| Fe           | -,998     | -,046 |
| Zn           | -,328     | -,689 |
| B            | -,385     | ,892  |

Variable Principal Normalization.

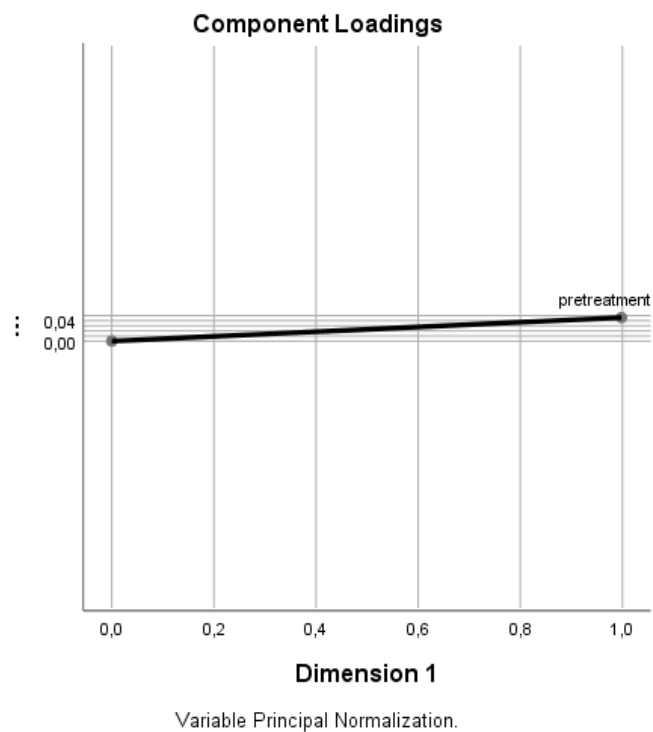

## CATPCA - Principal Components Analysis for Categorical Data

### Model Summary

| Dimension | Cronbach's Alpha   | Variance Accounted For |               |
|-----------|--------------------|------------------------|---------------|
|           |                    | Total<br>(Eigenvalue)  | % of Variance |
| 1         | 1,000              | 6,000                  | 100,000       |
| 2         | ,000               | ,000                   | ,000          |
| Total     | 1,000 <sup>a</sup> | 6,000                  | 100,000       |

a. Total Cronbach's Alpha is based on the total Eigenvalue.

## Plot

## Category Points



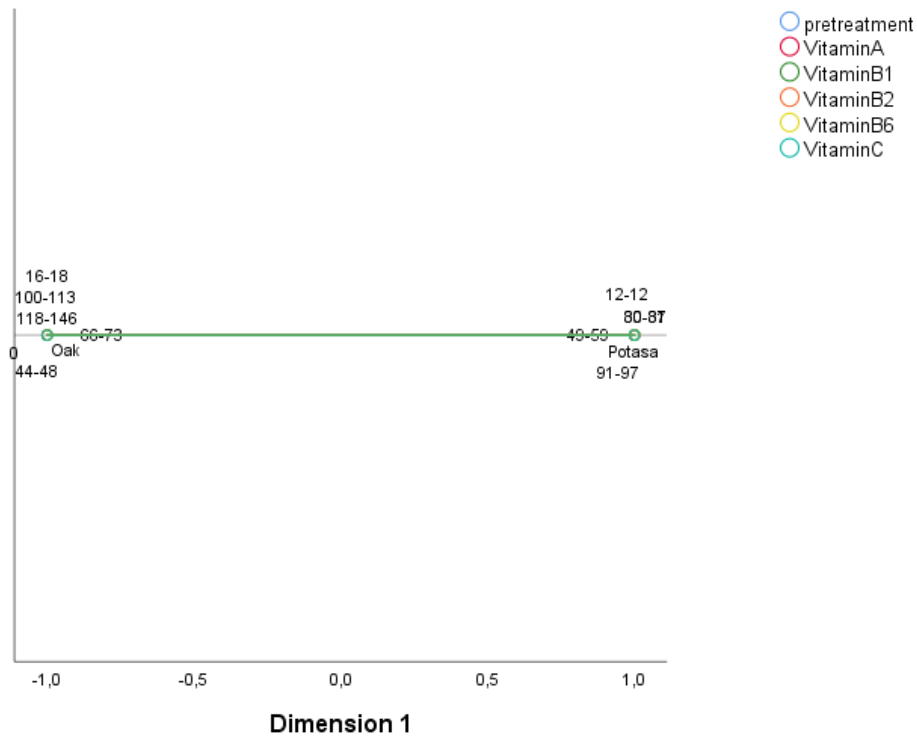

**Correlations Transformed Variables**

|              | pretreatment | VitaminB1 | VitaminB2 | VitaminB6 | VitaminC | VitaminA |
|--------------|--------------|-----------|-----------|-----------|----------|----------|
| pretreatment | 1,000        | -1,000    | -1,000    | -1,000    | -1,000   | -1,000   |
| VitaminB1    | -1,000       | 1,000     | 1,000     | 1,000     | 1,000    | 1,000    |
| VitaminB2    | -1,000       | 1,000     | 1,000     | 1,000     | 1,000    | 1,000    |
| VitaminB6    | -1,000       | 1,000     | 1,000     | 1,000     | 1,000    | 1,000    |
| VitaminC     | -1,000       | 1,000     | 1,000     | 1,000     | 1,000    | 1,000    |
| VitaminA     | -1,000       | 1,000     | 1,000     | 1,000     | 1,000    | 1,000    |
| Dimension    | 1            | 2         | 3         | 4         | 5        | 6        |
| Eigenvalue   | 6,000        | ,000      | ,000      | ,000      | ,000     | ,000     |

## Objects

## Object Points Labeled by

Object Points Labeled by Casenumbers

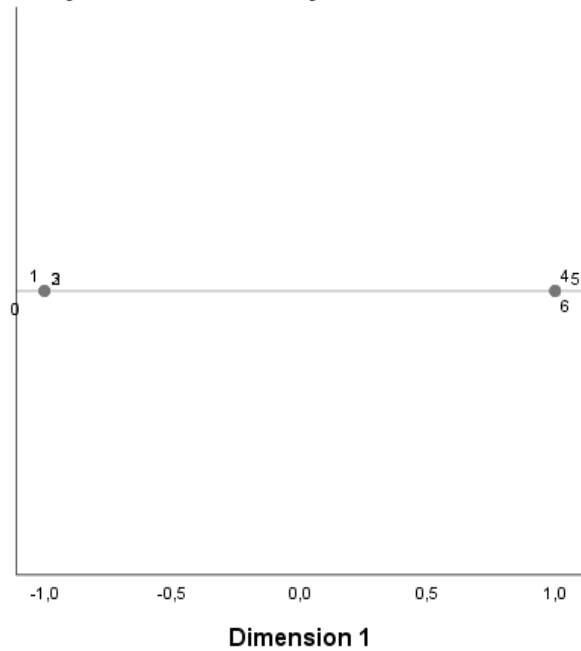

Variable Principal Normalization.

## Component Loadings

Component Loadings

|              | Dimension |      |
|--------------|-----------|------|
|              | 1         | 2    |
| pretreatment | 1,000     | ,000 |
| VitaminB1    | -1,000    | ,000 |
| VitaminB2    | -1,000    | ,000 |
| VitaminB6    | -1,000    | ,000 |
| VitaminC     | -1,000    | ,000 |
| VitaminA     | -1,000    | ,000 |

Variable Principal Normalization.

### Component Loadings

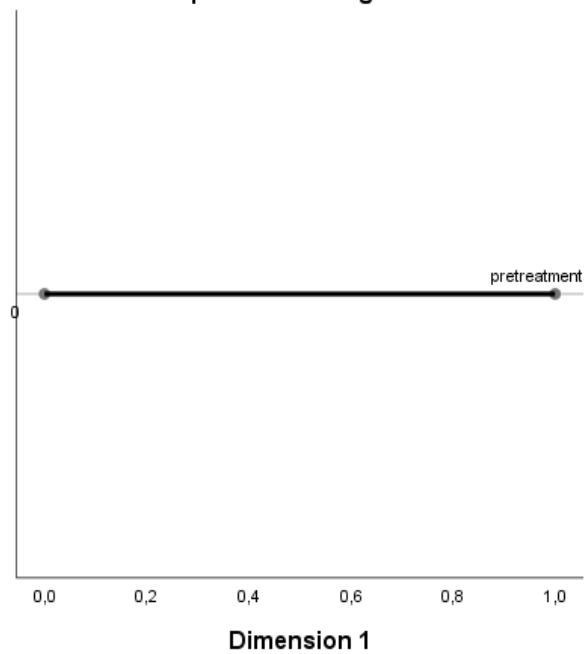

Variable Principal Normalization.
